# Supplementary material for: Projecting sediment export from two highly glacierized alpine catchments under climate change: Exploring non-parametric regression as an analysis tool
Source: Copernicus journal article supplement (doi:10.5194/egusphere-2023-1063), 2023-06-29
Supplement: Supplementary file [file egusphere-2023-1063-AC2-supplement.pdf]

Figures with references to answers to anonymous referee #2

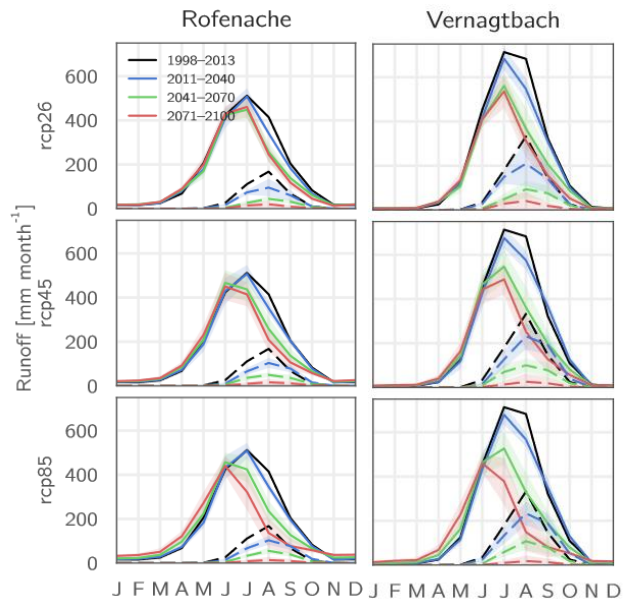

Figure 1 Changes in Q seasonality in AMUNDSEN results without bias-correction (from figure 15 in Hanzer et al., 2018)

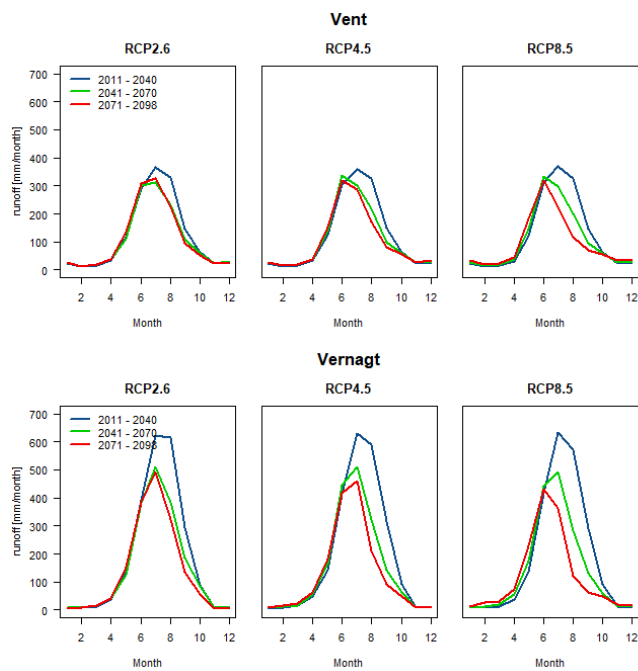

Figure 2 Changes in seasonality in bias-corrected AMUNDSEN discharge projections, i.e. after quantile mapping.

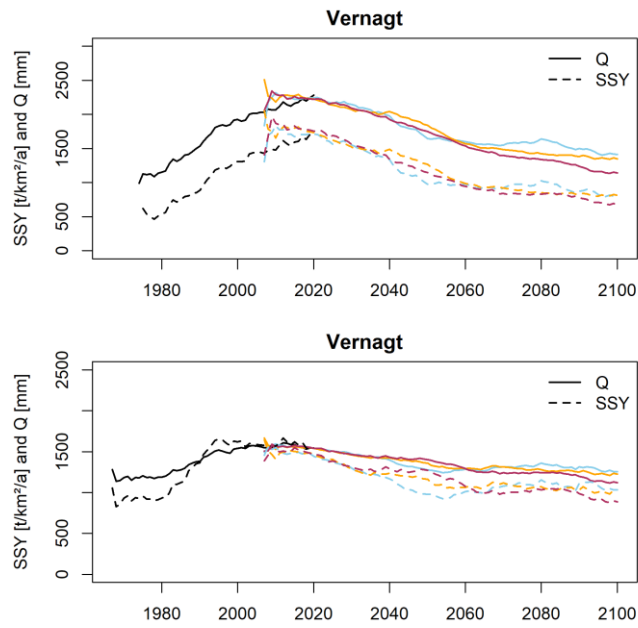

*This will be the new figure 11, showing the estimated timings of peak water and peak sediment. Black lines indicate past mean annual Q from measurements and mean annual SSY estimates of QRF model; colored lines correspond to different RCPs (compare to Figure 10). Underlying data have been smoothed using a 15-year moving average.*
